# Supplementary material
Source: ML conference proceedings conference paper supplement (https://openaccess.thecvf.com/content/CVPR2026/html/Stergiou_TRANSPORTER_Transferring_Visual_CVPR_2026_paper.html)
Supplement: Supplementary file 1 [file Stergiou_TRANSPORTER_Transferring_Visual_CVPR_2026_supplemental.pdf]

# TRANSPORTER : Transferring Visual Semantics from VLM Manifolds

## Supplementary Material

### Algorithm 1 $\rho$ -OT

#### Input:

Embeddings  $\widehat{\mathbf{z}}_{\Omega_1}, \widehat{\mathbf{z}}_{\Omega_2}$   
 Projection vectors  $\{\mathbf{p}_{\Omega_1, \rho}\}_{\rho=1}^P, \{\mathbf{p}_{\Omega_2, \rho}\}_{\rho=1}^P$   
 Temp.  $\tau$ , Reg. strength  $\lambda$ , Sinkhorn iter.  $K$   
 Uniform  $|\mathbf{N}| \times |\mathbf{N}|$  matrix  $\mathbf{U}$  (where  $U_{i,j} = 1/|\mathbf{N}|$ )

#### Output:

Transported  $\tilde{\mathbf{z}}_{\Omega} = \tilde{\mathbf{T}}\widehat{\mathbf{z}}_{\Omega_1}$

- 1:  $\mathbf{T} \leftarrow \mathbf{0} \in \mathbb{R}^{|\mathbf{N}| \times |\mathbf{N}|}$
- 2: **for**  $\rho \in \{1, \dots, P\}$  **do**
- 3:    $\mathbf{a}_{\rho} \leftarrow \langle \widehat{\mathbf{z}}_{\Omega_1, i}, \mathbf{p}_{\Omega_1, \rho} \rangle$
- 4:    $\mathbf{b}_{\rho} \leftarrow \langle \widehat{\mathbf{z}}_{\Omega_2, j}, \mathbf{p}_{\Omega_2, \rho} \rangle$
- 5:    $\mathbf{M}_{\rho} \leftarrow \langle -\|\mathbf{a}_{i, \rho} - \mathbf{b}_{j, \rho}\|_2 / \tau \rangle$     $\triangleright$  Neg. dist
- 6:    $\mathbf{M}_{\max} \leftarrow \langle \max_j (\mathbf{M}_{\rho, i, j}) \rangle$
- 7:    $\mathbf{R}_{\rho} \leftarrow \langle \exp(\mathbf{M}_{\rho, i, j} - \mathbf{M}_{\max, i}) \rangle$
- 8:    $\mathbf{T}_{\rho} \leftarrow \text{diag}(\mathbf{R}_{\rho} \mathbf{1})^{-1} \mathbf{R}_{\rho}$     $\triangleright$  Row softmax
- 9:    $\mathbf{T}_{\rho, \lambda} \leftarrow (1 - \lambda) \mathbf{T}_{\rho} + \lambda \mathbf{U}$     $\triangleright$  Uniform reg
- 10:    $\mathbf{T} \leftarrow \mathbf{T} + \mathbf{T}_{\rho, \lambda}$
- 11: **end for**
- 12:  $\tilde{\mathbf{T}} \leftarrow \mathbf{T} / P$     $\triangleright$  Avg slice plans
- 13: **for**  $k \in \{1, \dots, K\}$  **do**    $\triangleright$  Sinkhorn-Knopp
- 14:    $\tilde{\mathbf{T}} \leftarrow \text{diag}(\tilde{\mathbf{T}} \mathbf{1})^{-1} \tilde{\mathbf{T}}$     $\triangleright$  Row norm
- 15:    $\tilde{\mathbf{T}} \leftarrow \tilde{\mathbf{T}} \text{diag}(\mathbf{1}^T \tilde{\mathbf{T}})^{-1}$     $\triangleright$  Column norm
- 16: **end for**
- 17: **return**  $\tilde{\mathbf{T}} \widehat{\mathbf{z}}_{\Omega_1}$

## 6. Entropic Optimal Transport Formulation

Transport plan  $\gamma_{\rho}$  is found by minimizing transport cost  $\mathbf{M} = |\mathbf{a} - \mathbf{b}|$  and maximizing entropy:

$$\min_{\gamma_{\rho}} \underbrace{\int_{\mathbb{R} \times \mathbb{R}} \mathbf{M} d\gamma_{\rho}(\mathbf{a}, \mathbf{b})}_{\text{Transport cost}} - \tau \underbrace{\int_{\mathbb{R} \times \mathbb{R}} \gamma_{\rho}(\mathbf{a}, \mathbf{b}) \log(\gamma_{\rho}(\mathbf{a}, \mathbf{b})) d\mathbf{a} d\mathbf{b}}_{\text{Shannon entropy}} \quad (9)$$

where the differential  $d\gamma_{\rho}(\mathbf{a}, \mathbf{b})$  is the probability mass from  $\mathbf{a} \rightarrow \mathbf{b}$  alongside entropic regularization. A discrete form of (9) for  $\mathbf{N}$  tokens and transport plan  $\mathbf{T}_{\rho} \in \mathbb{R}^{|\mathbf{N}| \times |\mathbf{N}|}$  over cost matrix  $\mathbf{M}_{i,j, \rho} = \|\mathbf{a}_{i, \rho} - \mathbf{b}_{j, \rho}\|_2$ , given temperature  $\tau$ , can be formulated to find optimal transport  $\tilde{\mathbf{T}}$ :

$$\tilde{\mathbf{T}} = \underset{\mathbf{T}_{\rho}}{\text{argmin}} \frac{1}{P} \sum_{\rho=1}^P \left( \underbrace{\sum_{i,j \in \mathbf{N}} \mathbf{T}_{\rho} \mathbf{M}_{i,j, \rho}}_{\text{Transport cost}} + \tau \underbrace{\sum_{i,j \in \mathbf{N}} \mathbf{T}_{\rho} \log(\mathbf{T}_{\rho})}_{\text{Entropy regularization}} \right) \quad (10)$$

Solving the *full* doubly-constrained problem in (10) is computationally intensive. Thus, the proposed learnable  $\rho$ -OT provides an efficient approximation.

Table 4. **VLM architecture settings.** VideoLLaMA 3 (V), Gemma 3, (G), and Phi 4 MM (P), use different vision encoders, input resolutions, multi-modal projectors, and backbone LLMs.

| VLM | Vision Encoder $\mathcal{E}$ |                                       | MM proj |                | LLM  |  |
|-----|------------------------------|---------------------------------------|---------|----------------|------|--|
|     | Model                        | res                                   | dim     | Model          | prms |  |
| V   | SoViT-400m/14 [2]            | 384 <sup>2</sup>                      | 3584    | Qwen2.5 [5]    | 7B   |  |
| G   |                              | 896 <sup>2</sup>                      | 3584    | Gemma 3 [87]   | 12B  |  |
| P   | SigLIP-so400m/14 [92]        | [28 <sup>2</sup> , 448 <sup>2</sup> ] | 3072    | Phi 4 Mini [1] | 5B   |  |

## 7. Procedural details for OT

Projected embeddings  $\widehat{\mathbf{z}}_{\Omega_1}$  are learned to minimize their mean divergence to target  $\mathbf{z}_{\Omega}$ . However, this does not guarantee that target local token structures are learned similar to those of  $\widehat{\mathbf{z}}_{\Omega_2}$  optimized with the Gram-matrix loss. To combine their properties, learnable vectors  $\mathbf{p}_{\Omega_1}, \mathbf{p}_{\Omega_2}$  are used to compute an optimal transport plan as shown in Algorithm 1. Embeddings  $\widehat{\mathbf{z}}_{\Omega_1}, \widehat{\mathbf{z}}_{\Omega_2}$  are projected to  $\mathbf{a}, \mathbf{b}$  based on their inner product with  $\mathbf{p}_{\Omega_1, \rho}, \mathbf{p}_{\Omega_2, \rho}$ . Cost matrix  $\mathbf{M}_{\rho}$  per  $\rho$  is computed from their negative pair-wise l2 distance, scaled by the temperature  $\tau$ . This avoids computing a single, high-dimensional cost matrix and instead computes multiple, simpler cost matrices. The cost also enforces  $\mathbf{p}_{\Omega_1}, \mathbf{p}_{\Omega_2}$  to produce projections with strong correspondence across the diagonal  $\mathbf{a}_{i, \rho} \approx \mathbf{b}_{i, \rho}$ . For numeric stability, the cost matrix  $\mathbf{M}_{\rho}$  is normalized by row-wise softmax for  $P$ . To avoid sparsity,  $\tilde{\mathbf{T}}$  is regularized with a uniform distribution  $\frac{1}{|\mathbf{N}|} \mathbf{U}$  with weight  $\lambda$ . The final transport plan  $\tilde{\mathbf{T}}$  is computed by averaging the sliced plans, followed by  $K = 3$  Sinkhorn-Knopp [52] iterations to ensure a better approximation to the doubly-stochastic matrix of (10).

## 8. Additional implementation details

**VLM selection.** An overview of the selected VLM details is provided in Tab. 4. As shown, the models represent a wide spectrum of design choices varying in fundamental components such as visual encoders, embedding space size, and backbone language models. This heterogeneity aims to better reflect the general applicability of *TRANSPORTER*, as the presented results are not bound to a single model family or design paradigm, enabling a comprehensive analysis.

**Coupling network datasets.** In total, 200K videos are used for training the coupling network. This includes 40K VA-TEX, 80K LAVIB, and 80K Ego4D annotated clips. As VA-TEX is the smallest of the three, all training videos are used. In contrast, 160K total videos from LAVIB and Ego4D are selected. The choice of 200K iterations and dataset distri-

Table 5. **FVD and CLIPScores across dataset settings.** Evaluation metrics are reported as in Tab. 1. Best results are in **bold** and the used setting is in **blue**.

|       |      | EGO4D                     |                                   |                           |                                |
|-------|------|---------------------------|-----------------------------------|---------------------------|--------------------------------|
|       |      | 40K                       | 80K                               | 120K                      | 160K                           |
| LAVIB | 40K  | 2.12e <sup>2</sup> /34.86 | 1.72e <sup>2</sup> /35.10         | 1.33e <sup>2</sup> /35.41 | 1.23e <sup>2</sup> /35.43      |
|       | 80K  | 1.65e <sup>2</sup> /35.24 | <b>1.25e<sup>2</sup>/35.44</b>    | 1.22e <sup>2</sup> /35.50 | 1.20e <sup>2</sup> /35.52      |
|       | 120K | N/A                       | 1.23e <sup>2</sup> /35.50         | 1.19e <sup>2</sup> /35.53 | <b>1.18e<sup>2</sup>/35.54</b> |
|       | 160K | N/A                       | 1.19e <sup>2</sup> / <b>35.54</b> | N/A                       | N/A                            |

butions is found by the grid search in Tab. 5. Larger dataset samples only provide marginal improvements over the coupling network’s reconstruction task, but with larger computational overheads. Thus, an 80/80K split is selected while taking into account training setup ablations.

**Concept bank attributes.** Tab. 6 presents learned vectors of concept/attribute modulations in context to the prompts used. In total, 33 unique modulations are presented in the paper, of which 10 relate to active objects, 11 are based on the action performed, 8 on scene changes, and 4 include object/action/scene combinations. With respect to the models used, 12 unique modulations are presented for Video LLaMA 3 logits, 11 for Gemma 3, and 10 for Phi 4 MM. The inclusion of different modulations shows the wide applicability of *TRANSPORTER* and its usability as a tool for exploring different aspects of video understanding.

## 9. OT types and compute times

*TRANSPORTER* is based on an optimal transport coupling between embedding spaces. Dimension size differences between representations limit the potential application of standard optimal transport approaches. As an alternative to the proposed  $\rho$ -OT module in Sec. 3.2, other learned approaches such as Wasserstein Auto-Encoders (WAE) [89], and Gromov-Wasserstein Auto-Encoders (GWAE) [66] can also be used. Tab. 7 presents FVD video quality across optimal transport methods as well as their computational overheads. Performance drops significantly for the heuristic approach as the transport plan in sGW does not preserve the sequential structure of tokens and their dynamics. The autoencoder [66, 89] approaches are implemented with two-MLP-layer encoders and decoders to avoid OOM errors. They achieve comparable performance to the proposed  $\rho$ -OT, but with a significant increase in computations required per iteration. Overall,  $\rho$ -OT with  $P = 100$  provides a balanced OT approach given the compute overhead and performance.

## 10. Ablations with Phi 4 MM logits

Supplementary to Tab. 3, ablations are performed on *TRANSPORTER* settings on Phi 4 MM logits. Tab. 8

presents results over both coupling network and concept banks variants. Caption similarity drops in the inference-only setting compared to any of the other coupling network alternatives. Similarly, to Tab. 3, a small divergence is observed between the number of projections  $P$ . Overall,  $P = 100$  still maintains competitive caption similarity with the average difference between the two top-performing projection settings being  $\pm 0.71$  across BLEU scores,  $\pm 0.91$  for CIDEr,  $\pm 0.48$  for METEOR, and  $\pm 0.73$  for SPICE. For the concept bank, most significant improvements are observed for CIDEr with +2.31 and B@2 with +1.83.

## 11. Modulations across phenomena

Critically, the applicability of VLMs depends on their ability to distinguish between opposing or distinct semantic meanings. Prior benchmarks have explored VLMs’ response sensitivity across object plurality [24], preposition [23], and plausibility [22]. In parallel with these studies on VLM outputs, *TRANSPORTER* can provide visual representations of token predictions. Such modulation pairs linguistically ground VLMs across various aspects. This provides a novel path for future work to visually explore interpretability-related themes.

**Plurality/counting.** Fig. 9a presents modulation over one and two flowers being picked. VLMs often struggle with counting since it requires semantically matching language to visual prompts, both at a semantic level and in terms of location in frames. Videos present an additional challenge, as transitioning from one to two flowers requires an extra action that not all models can always infer.

**Preposition.** Fig. 9b visualizes a linguistic preposition, which should result in significant changes in the scene. The initial woman shouting intensively to a man is not successfully changed to man shouting intensively to a woman. The resulting videos from VideoLLaMA 3 and Phi 4 MM show that such fine-grained preposition details are often missed.

**Relation/plausibility.** Fig. 9c shows VLMs’ reliance on priors in terms of object relations and physical plausibilities. Resulting videos when modulating to sitting under a chair either visualize the chair at a different location in the scene (lack of spatial understanding) or the scene resembles sitting under a table (potentially closer to the training distribution).

## 12. Additional qualitative results

In addition to the examples in Sec. 4.3, modulations for objects, actions, scenes, and their combinations are shown.

**Active object.** As in Figs. 11a and 11d, *TRANSPORTER* can generate videos to visualize transitions between different object attributes, such as color or material types. The sharpness of the transition also varies across modulations.

Table 6. Prompts and modulations used for exploring active object, action performance, scene context, and combined settings logits. Source-to-target modulations across Video LLaMA 3 (v), Gemma 3 (G), and Phi 4 MM (P) logits are denoted between  $\pi^-$  and target  $\pi^+$ .

| VLM                      | Fig.  | prompt (A ...)                                                                                                               | Modulations          |                      |
|--------------------------|-------|------------------------------------------------------------------------------------------------------------------------------|----------------------|----------------------|
|                          |       |                                                                                                                              | $\pi^-$              | $\pi^+$              |
| — Active Objects —       |       |                                                                                                                              |                      |                      |
| G                        | 3     | close up shot of a <input type="checkbox"/> bowling ball hitting pins in a bowling alley                                     | red                  | blue                 |
| V                        | 6     | person juggling <input type="checkbox"/> outdoors.                                                                           | balls                | clubs                |
| V                        | 11a   | person pushing a <input type="checkbox"/> stroller outdoors during a sunny day.                                              | purple               | pink                 |
| V                        | 11b   | video of a scuba diver swimming underwater in the ocean and picking up a <input type="checkbox"/> .                          | starfish             | seashell             |
| V                        | 11c   | close-up of a person baking <input type="checkbox"/> cookies. The cookies are on a baking tray.                              | christmas tree       | circle               |
| G                        | 11d   | video of a person writing TRANSPORTER on a <input type="checkbox"/> table.                                                   | wood                 | metal                |
| G                        | 11e   | video of a person reading a <input type="checkbox"/> while sitting on a park bench.                                          | book                 | newspaper            |
| G                        | 11f   | person picking a(n) <input type="checkbox"/> in a grocery store with shelves of fruits and vegetables in the background.     | mango                | apple                |
| P                        | 11g   | person painting a wall with a <input type="checkbox"/> .                                                                     | roll                 | brush                |
| P                        | 11h   | top-view video of a person typing on a <input type="checkbox"/> .                                                            | typewriter           | keyboard             |
| — Action performance —   |       |                                                                                                                              |                      |                      |
| V                        | 5     | video of a person <input type="checkbox"/> to get on the train.                                                              | walking              | running              |
| G                        | 6     | artistic gymnast performing a routine landing a dismount with a <input type="checkbox"/> handspring and a full twist.        | front                | back                 |
| P                        | 7c    | close-up video of a person <input type="checkbox"/> a car door with a cloth.                                                 | wiping               | spraying             |
| V                        | 12a   | video of a surfer <input type="checkbox"/> at the open sea.                                                                  | surfing              | kite surfing         |
| V                        | 12b   | a video of a teenager <input type="checkbox"/> at a public staircase in a city center.                                       | roller skating       | skateboarding        |
| V                        | 12c   | person <input type="checkbox"/> in a lush field full of flowers                                                              | running              | spinning             |
| G                        | 12d   | video of a chef <input type="checkbox"/> pizza dough in his kitchen                                                          | rolling              | stretching           |
| G                        | 12e   | video of a person that <input type="checkbox"/> s a cup of coffee in the kitchen.                                            | stir                 | pour                 |
| G                        | 12f   | a cowboy <input type="checkbox"/> a brown horse in the outback..                                                             | riding               | leading              |
| P                        | 12g   | person <input type="checkbox"/> a soccer ball at a soccer field.                                                             | toe bouncing         | head bouncing        |
| P                        | 12h   | video of a person that <input type="checkbox"/> boxes to his car.                                                            | picks up             | drags                |
| — Scene context —        |       |                                                                                                                              |                      |                      |
| V                        | 2     | video of a band playing music on a promenade. The camera zooms to the musician on the <input type="checkbox"/> of the scene. | left                 | right                |
| P                        | 6     | hitchhiker standing on the side of the road and puts up a cardboard sign that says <input type="checkbox"/> .                | Chicago              | New York             |
| V                        | 13a   | person existing a classic car parked at a <input type="checkbox"/> .                                                         | parking lot          | underpass            |
| V                        | 13b   | golfer hitting the ball while on <input type="checkbox"/> .                                                                  | grass                | sand trap            |
| G                        | 13c   | person painting a wall <input type="checkbox"/> .                                                                            | outdoors             | indoors              |
| G                        | 13c   | video of a tennis player getting ready to serve the ball on a <input type="checkbox"/> court.                                | clay                 | grass                |
| P                        | 13e   | group of firefighters rescuing a cat stranded on a <input type="checkbox"/> .                                                | tree                 | roof                 |
| P                        | 13f   | video showing a group of people playing beach volleyball on a day with <input type="checkbox"/> .                            | overcast             | clear sky            |
| — Combined modulations — |       |                                                                                                                              |                      |                      |
| P                        | 7a,7b | chef cutting <input type="checkbox"/> into <input type="checkbox"/> pieces.                                                  | two thin             | one thick            |
| V                        | 14a   | person riding a <input type="checkbox"/> while wearing a <input type="checkbox"/> and <input type="checkbox"/> jeans.        | bicycle jacket black | scooter t-shirt blue |
| G                        | 14b   | video of a person with <input type="checkbox"/> hair color during a <input type="checkbox"/> walk around the city.           | black night          | red morning          |
| P                        | 14c   | person <input type="checkbox"/> at <input type="checkbox"/> wearing an orange life vest.                                     | canoeing lake        | kayaking river       |

Table 7. Video quality, semantic alignment, and compute times across OT methods. Times are averaged over 1K videos across 3 runs on a single NVIDIA L40s with Video LLaMA 3 embeddings as targets. It is assumed that tensors are on the GPU without CPU offloading. Best results are in bold and the used setting is in blue.

| OT Method                        | FVD↓      | Compute time (secs. [secs./fit])↓      |                     |                      |
|----------------------------------|-----------|----------------------------------------|---------------------|----------------------|
|                                  |           | fwd                                    | bwd                 | tot                  |
| — Heuristic —                    |           |                                        |                     |                      |
| sGW $P = 100$                    | $5.42e^2$ | 272.48 [2.18]                          | N/A                 | 272.48 [2.18]        |
| — Learned —                      |           |                                        |                     |                      |
| WAE† $C = \{$                    | 768       | $1.73e^2$ 538.81 [4.31]                | 178.67 [1.43]       | 717.43 [5.74]        |
|                                  | 1152      | $1.46e^2$ 778.84 [6.23]                | 234.86 [1.88]       | 1012.03 [8.11]       |
| GWAE† $C = 1152$                 | $1.50e^2$ | 853.73 [6.83]                          | 217.55 [1.74]       | 1071.24 [8.57]       |
| — TRANSPORTER —                  |           |                                        |                     |                      |
| $\rho$ -OT $P = \left\{ \right.$ | 50        | $1.62e^2$ <b>206.23 [1.65]</b>         | <b>49.97 [0.40]</b> | <b>256.23 [2.05]</b> |
|                                  | 100       | $1.25e^2$ 227.64 [1.82]                | 65.11 [0.52]        | 292.46 [2.34]        |
|                                  | 200       | $1.09e^2$ 260.03 [2.08]                | 126.25 [1.01]       | 386.24 [3.09]        |
|                                  | 400       | <b>9.81e<sup>1</sup></b> 361.27 [2.89] | 157.52 [1.26]       | 518.76 [4.15]        |

In fine-grained object changes such as  starfish to  seashell in Fig. 11b or  roll to  brush in Fig. 11g, the transition from  $\pi^-$  to  $\pi^+$  happens over small  $\Delta\omega$  fractions. Learned geometric and appearance object properties can also be seen during transitions in Figs. 11c and 11e with edges in complex shapes such as those of  christmas tree being flattened to round edges, or the hardback of a  book transitioning to a paperback, and eventually  newspaper pages.

† Trained on half batch size and double gradient accumulation steps

**Action performance.** In actions where their performance is proximal, such as  surfing and  kitesurfing in Fig. 12a,  roller skating and  skateboarding in Fig. 12b, and  toe bouncing and  head bouncing in Fig. 12g, modulations show that small and distinct changes are learned. The difference in speed can be seen in cases where action verbs differ significantly in their executions, such as  running and  spinning in Fig. 12c. Transitions between actions with even larger differences in their executions are simultaneously visible as in  riding to  leading in Fig. 12f.

**Scene context.** Scene modulations include backgrounds Figs. 13a, 13c, 13e and 13f, and locations Figs. 13b and 13d. The resulting videos show TRANSPORTER’s ability to generate videos with in-context modulations. Aspects such as the performance of the action or the appearances of objects/actors remain constant throughout the transition between source and target logits.

**Combined.** In settings with combined modulation, transitions of individual logit pairs are visualized over different  $\Delta\omega$ . Fig. 14a shows that transitioning between  black and  blue happens first, as their logit and embedding distance is shorter than other pairs. In contrast, the changes from  jacket to  t-shirt, and  bicycle to

due to OOM. Approx. fwd/bwd/tot reported.

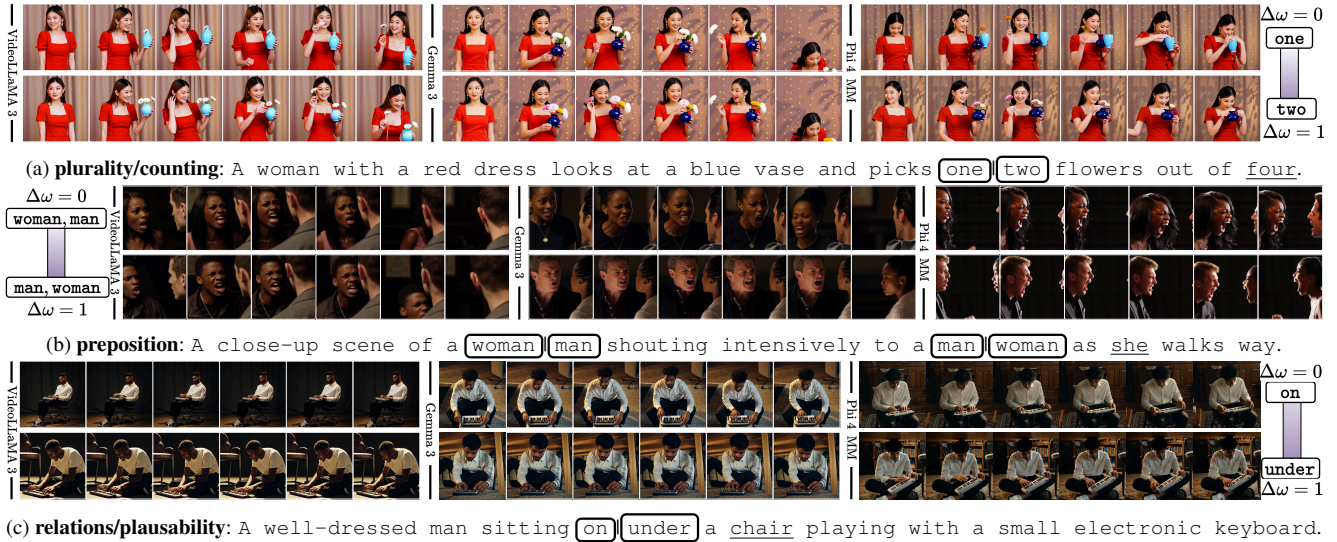

Figure 10. **Modulation types comparisons** across VideoLLaMA 3, Gemma 3, Phi 4 MM, over (a) **plurality/counting**, (b) **preposition**, and (c) **relations/plausability**. The same rng (0) is used for *TRANSPORTER* inference across VLMs.

Table 8. **Phi 4 MM cosine similarity ( $\nabla_{\text{cos}}$ ), BLEU (B@1, B@2, B@3, B@4), CIDEr (C), METEOR (M), and SPICE (S)** over captions from *TRANSPORTER* videos and target captions. Settings are grouped in relation to the coupling network or the concept bank. Best results are **bold** and second best are underlined.

| Method                                    | Phi 4 MM              |              |              |              |              |              |              |              |
|-------------------------------------------|-----------------------|--------------|--------------|--------------|--------------|--------------|--------------|--------------|
|                                           | $\nabla_{\text{cos}}$ | B@1          | B@2          | B@3          | B@4          | C            | M            | S            |
| Baseline [82]                             | 0.04                  | 25.22        | 11.10        | 4.35         | 0.01         | 5.01         | 11.84        | 8.64         |
| Coupling network ablations                |                       |              |              |              |              |              |              |              |
| inference-only                            | 0.34                  | 29.25        | 20.52        | 14.72        | 10.28        | 23.89        | 15.92        | 21.50        |
| mean( $\Phi_{\Omega_1, \Omega_2}$ )       | 0.37                  | 30.93        | 21.23        | 15.45        | 11.64        | 24.11        | 16.63        | 24.37        |
| sGW OT                                    | 0.32                  | 25.61        | 16.47        | 13.28        | 9.81         | 23.44        | 13.15        | 12.63        |
| $P = \begin{cases} 50 \\ 400 \end{cases}$ | 0.41                  | 34.03        | 22.59        | 16.66        | 12.82        | 28.64        | 20.30        | 27.75        |
|                                           |                       | <b>0.44</b>  | <b>35.24</b> | <b>23.78</b> | <b>18.53</b> | <b>14.08</b> | <b>30.42</b> | <b>21.35</b> |
| Concept bank ablation                     |                       |              |              |              |              |              |              |              |
| $\Delta\omega$ JS                         | 0.36                  | 33.15        | 21.42        | 15.87        | 11.93        | 28.20        | 18.56        | 27.42        |
| <i>TRANSPORTER</i>                        | <u>0.43</u>           | <u>34.77</u> | <u>23.25</u> | <u>17.30</u> | <u>13.49</u> | <u>29.51</u> | <u>20.87</u> | <u>28.23</u> |

scooter happen at similar  $\Delta\omega$  variance, showing that appearance attributes are encoded over larger manifolds.

### 13. Further discussions

**Limitations.** The manually selected modulations across model logits aim to visualize the learned representations and manifold between concepts. However, as noted, the interpolation is done based on learned vectors for concept pairs over VLM logit divergences. This can limit the clarity of explanations of entangled concepts for which vectors  $\mathbf{q}_o$  are learned from source and target concept/attributes that are not directly orthogonal. As the current method is based on discrete concept pairs, a future direction could be generalizing L2V and *TRANSPORTER* to continuous attributes. For example, instead of slow  $\leftrightarrow$  fast, the model could

learn a speed vector, allowing a user to control the pace with a continuous scalar, not just an interpolation. This can further enable the applicability of *TRANSPORTER* in zero-shot concept pairs at inference.

**Potential improvements.** Although the focus has been on establishing L2V as a fruitful direction for video model interpretability, extending the method to few-shot video concept visualization can be an area of improvement. Instead of a discrete, static concept bank  $\mathbf{Q}$ , L2V can be formulated to model concept directions from a (learned) continuous function  $f_{\theta}(\pi^-, \pi^+) \rightarrow \mathbf{q}_o$ . This function could be trained to approximate the embedding manifold of any two text prompts used as input and output the corresponding latent direction vector  $\mathbf{q}$ . Potentially, this could be modeled contrastively [11, 92] on a large corpus of text-pair-video data. Inference-time semantic edits [18], uncertainty quantification [104], and model merging with model-specific vectors [35, 97] can also be adopted to reduce reliance on training concept vectors.

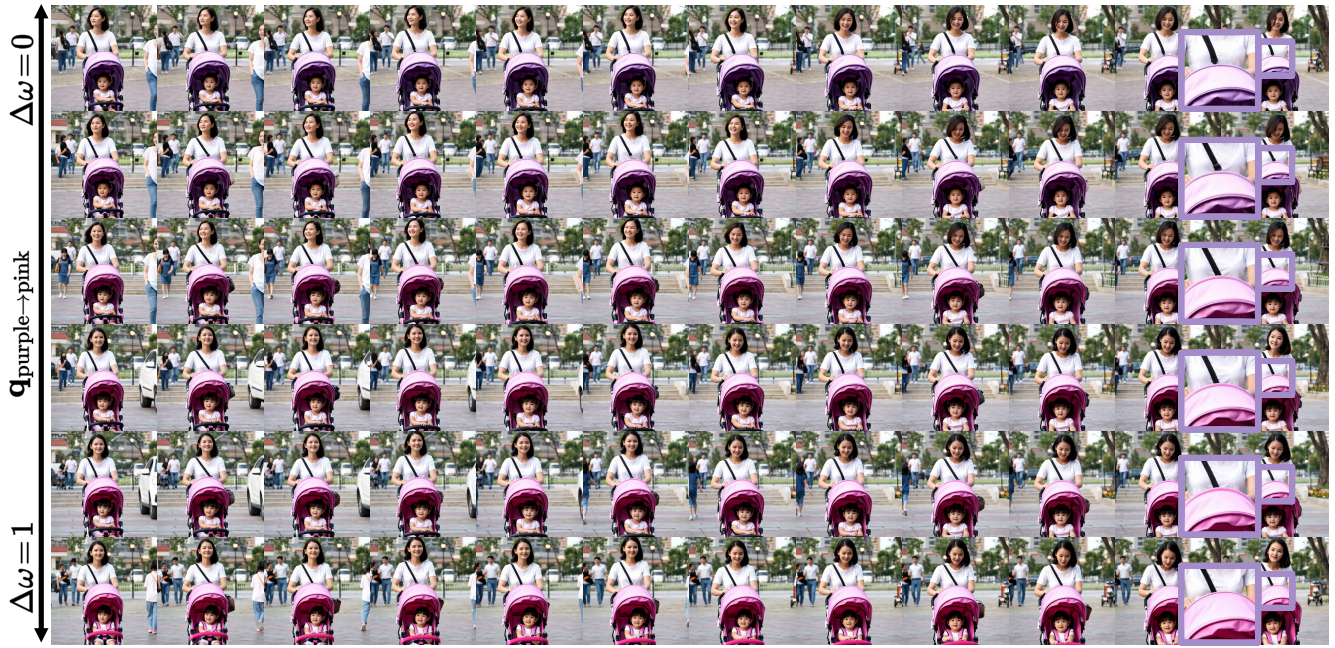

(a) Video LLaMA 3 modulations between `purple` and `pink`.

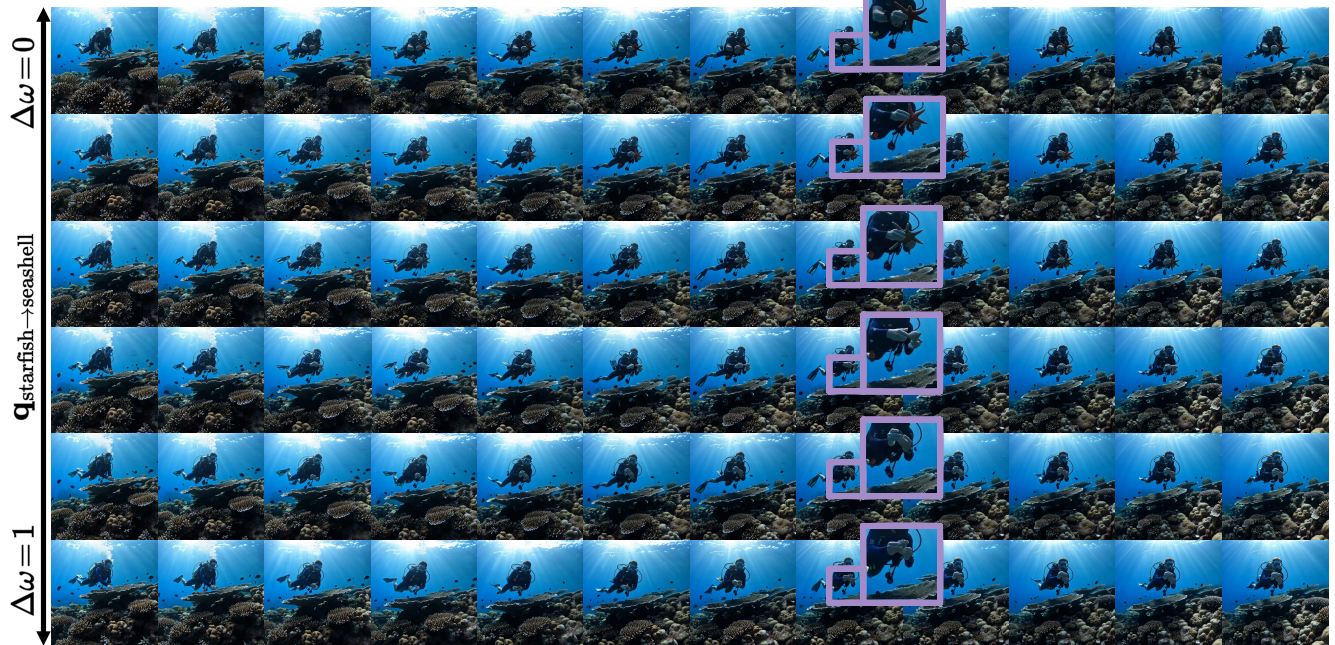

(b) Video LLaMA 3 modulations between `starfish` and `seashell`.

Figure 11. Examples of active object modulations. Frame quality is compressed due to filesize (best viewed digitally).

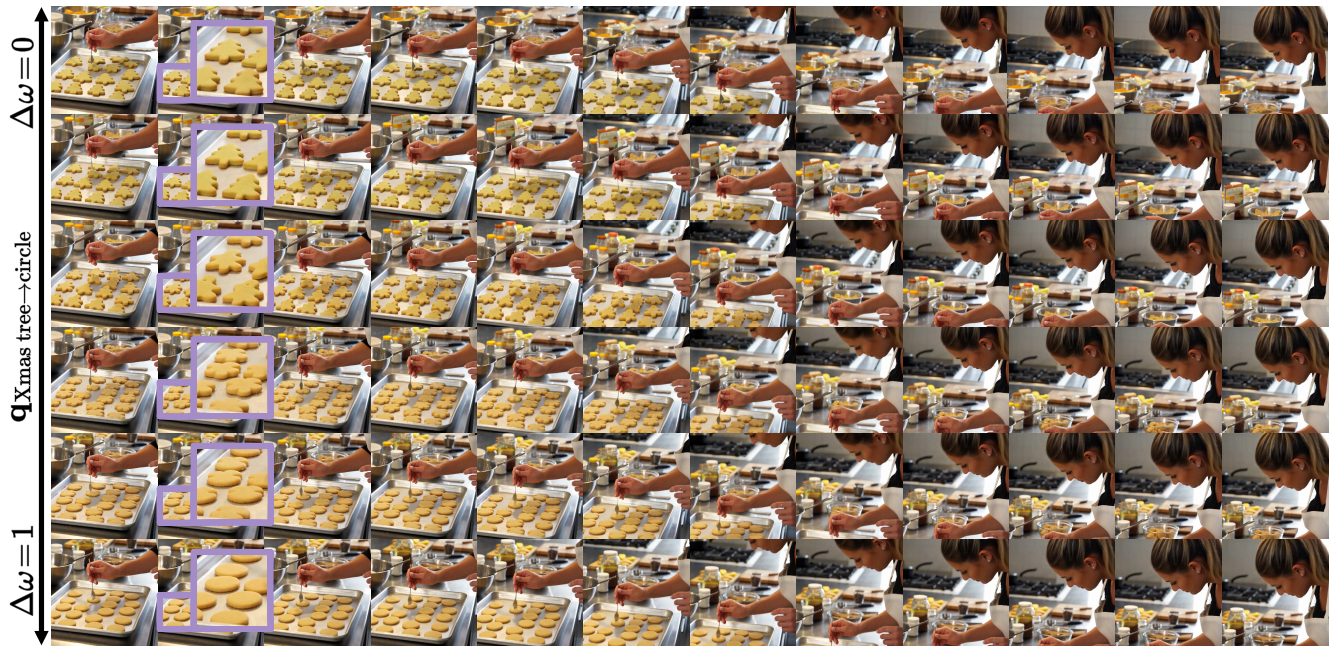

(c) Video LLaMA 3 modulations between `christmas tree` and `circle`.

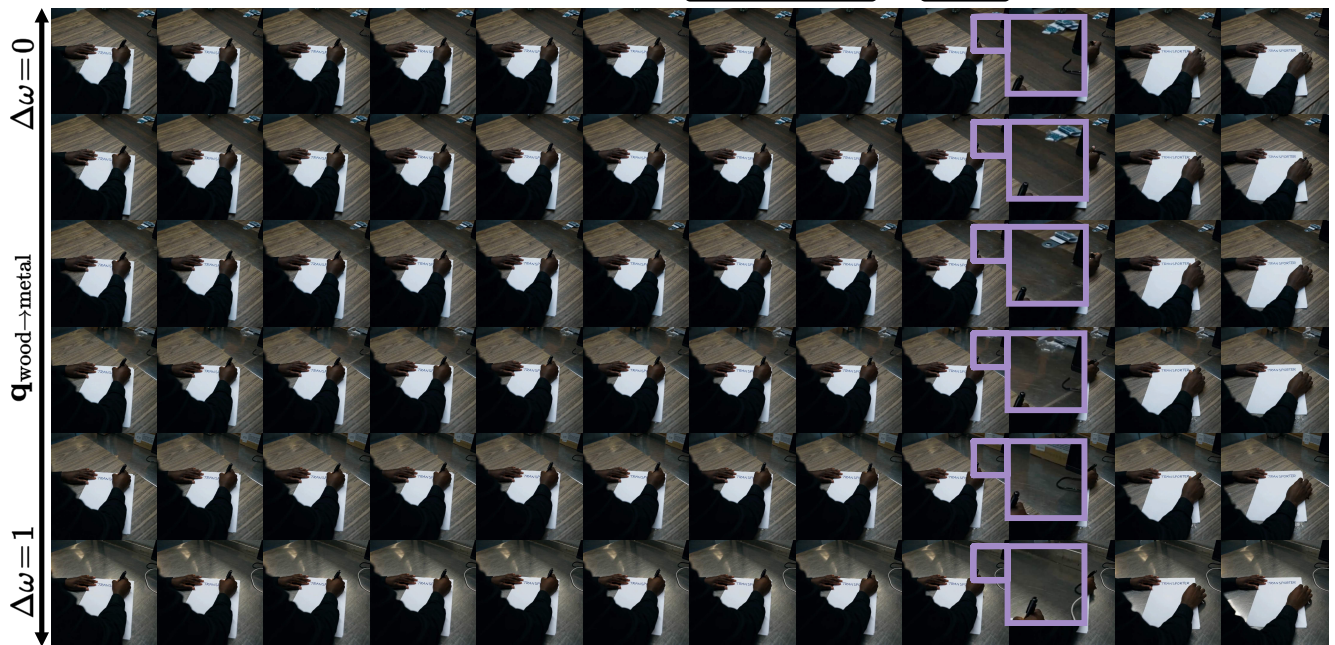

(d) Gemma 3 modulations between `wood` and `metal`.

Figure 11. Examples of active object modulations. Frame quality is compressed due to filesize (best viewed digitally).

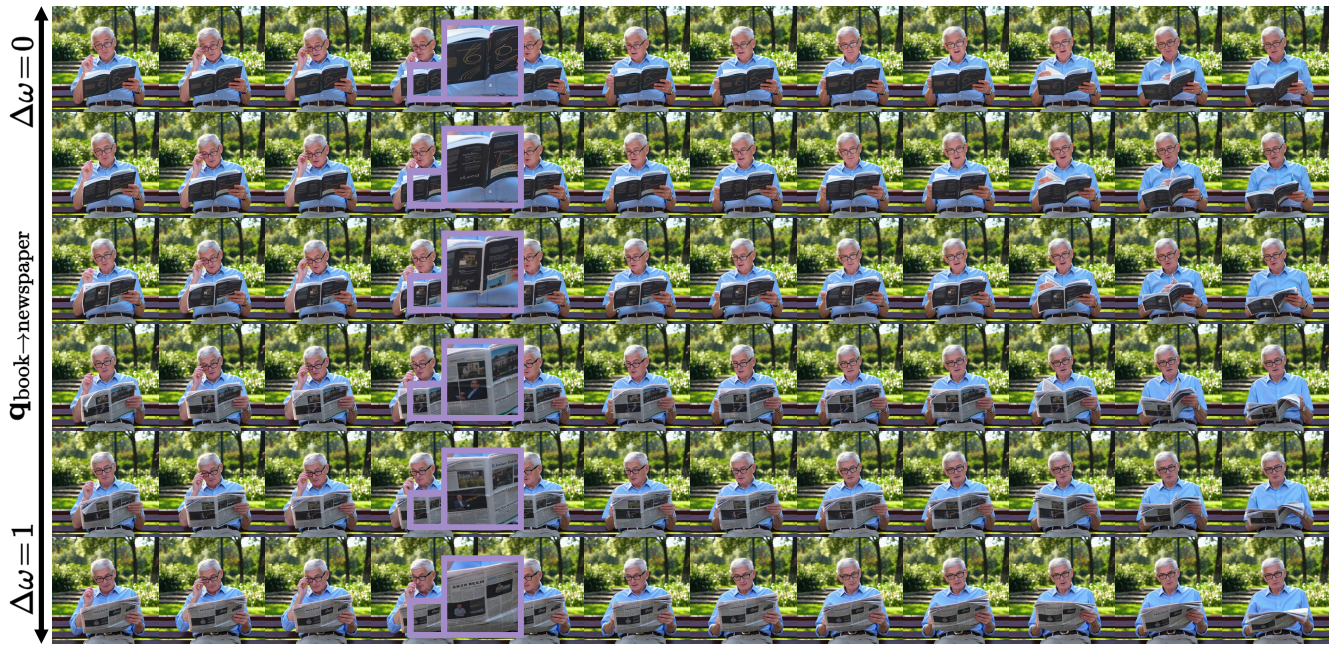

(e) Gemma 3 modulations between `book` and `newspaper`.

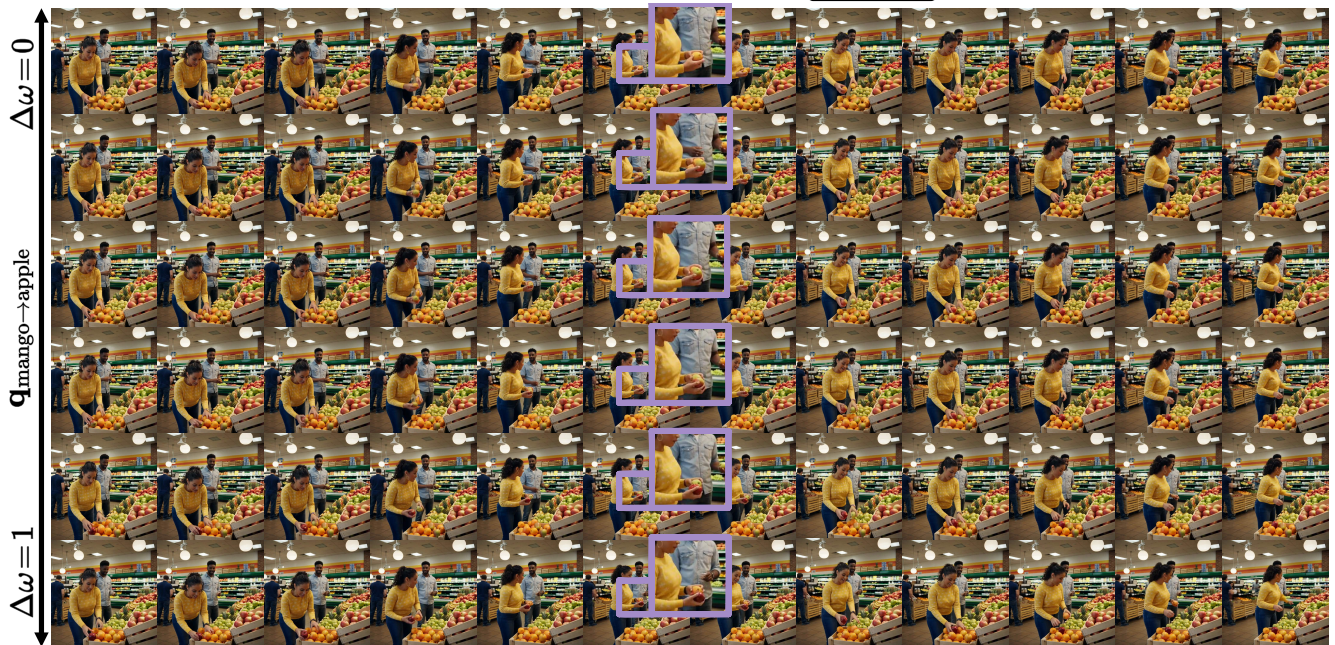

(f) Gemma 3 modulations between `mango` and `apple`.

Figure 11. **Examples of active object modulations.** Frame quality is compressed due to filesize (best viewed digitally).

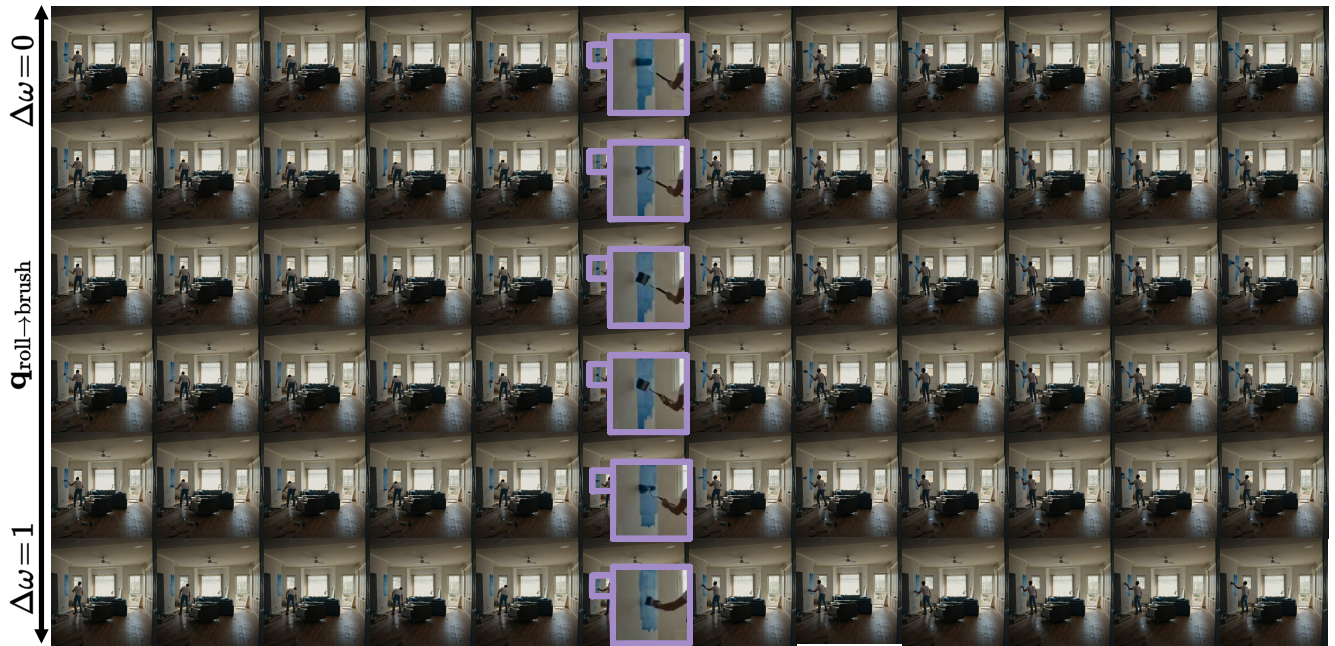

(g) Phi 4 MM modulations between `roll` and `brush`.

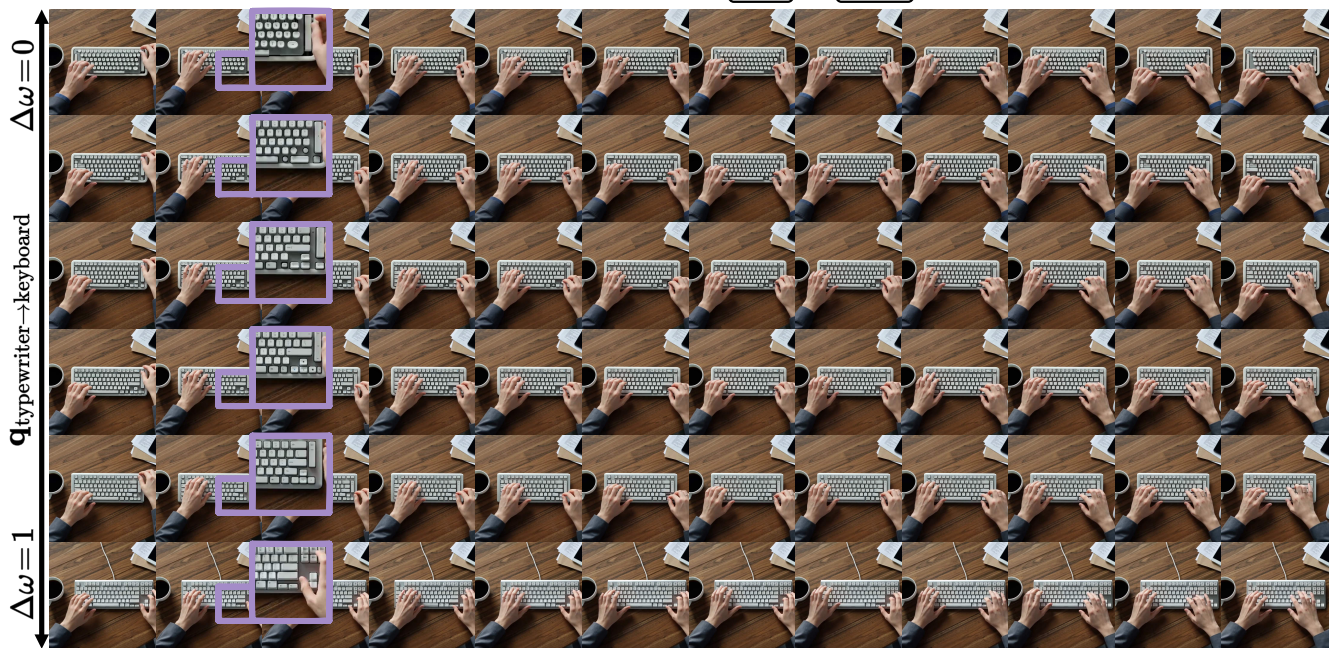

(h) Phi 4 MM modulations between `typewriter` and `keyboard`.

Figure 11. **Examples of active object modulations.** Frame quality is compressed due to filesize (best viewed digitally).

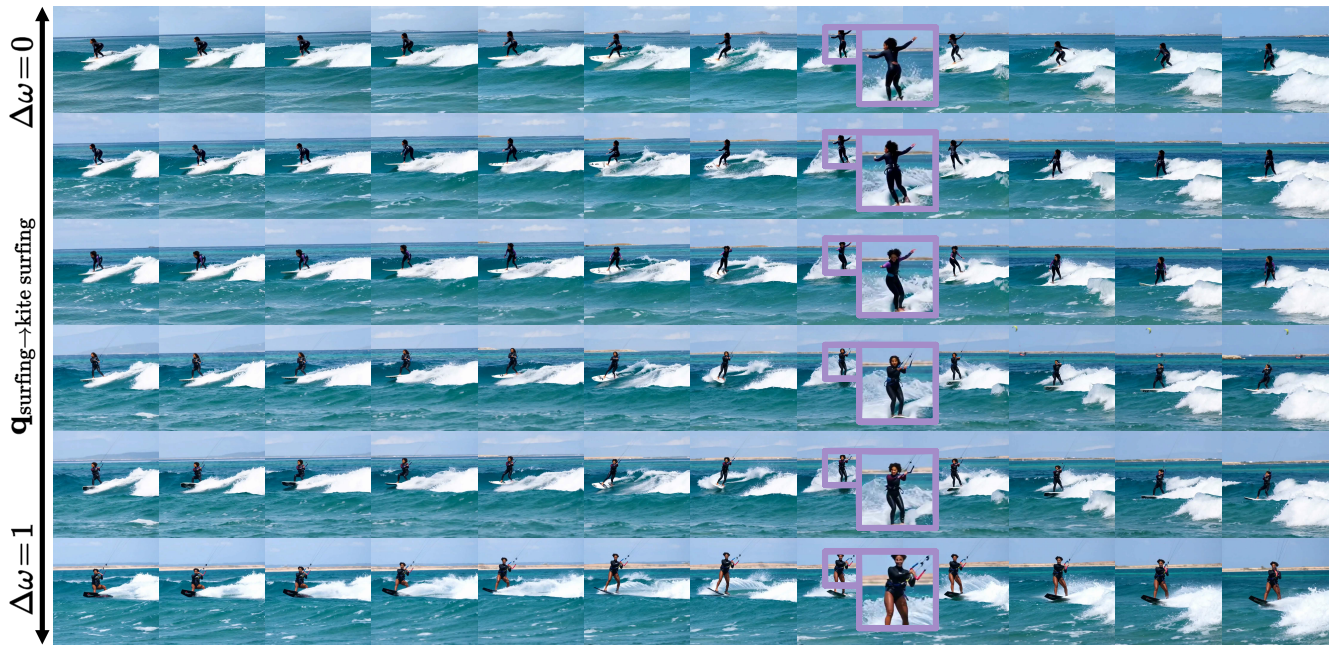

(a) Video LLaMA 3 modulations between `surfing` and `kitesurfing`.

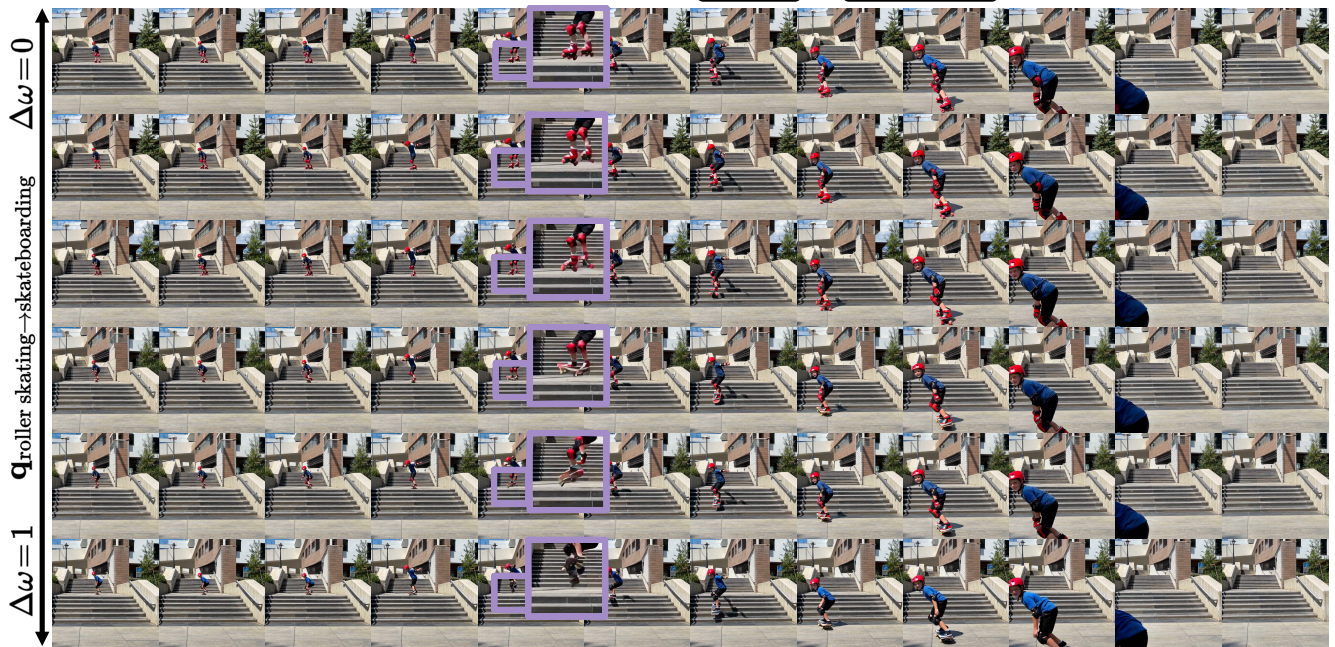

(b) Video LLaMA 3 modulations between `roller skating` and `skateboarding`.

Figure 12. **Examples of action modulations.** Frame quality is compressed due to filesize (best viewed digitally).

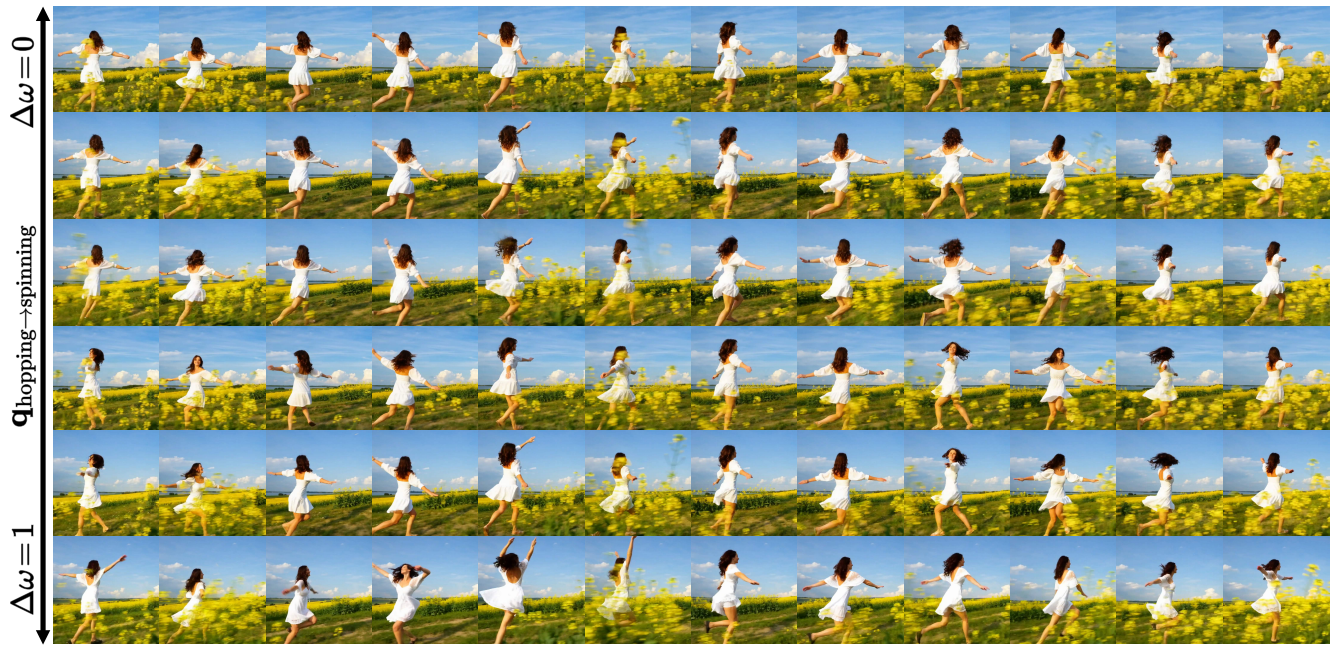

(c) Video LLaMA 3 modulations between `running` and `spinning`.

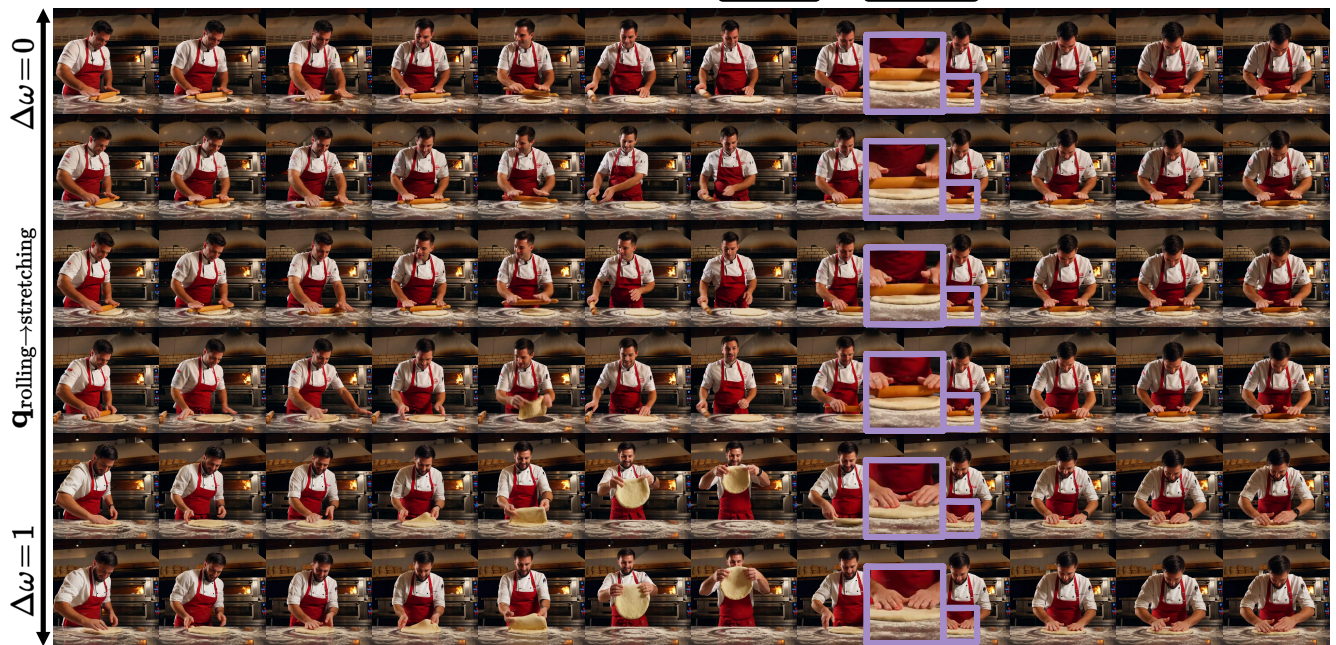

(d) Gemma 3 modulations between `rolling` and `stretching`.

Figure 12. **Examples of action modulations.** Frame quality is compressed due to filesize (best viewed digitally).

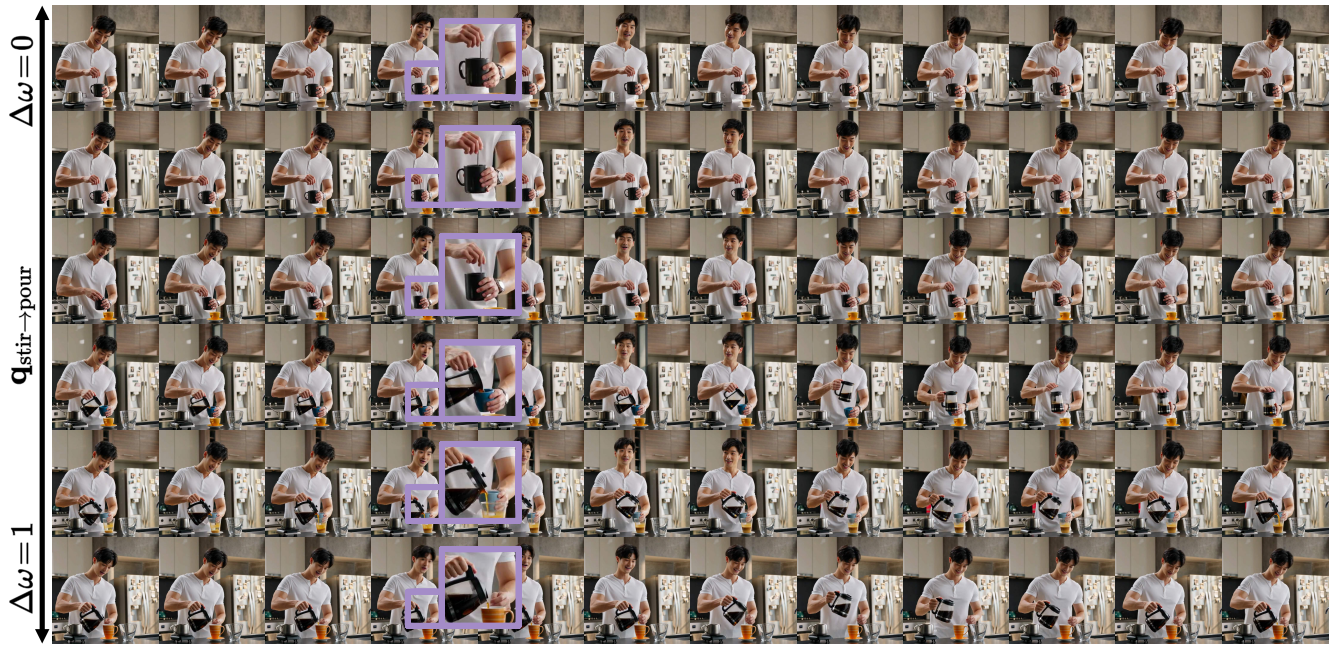

(e) Gemma 3 modulations between `stir` and `pour`.

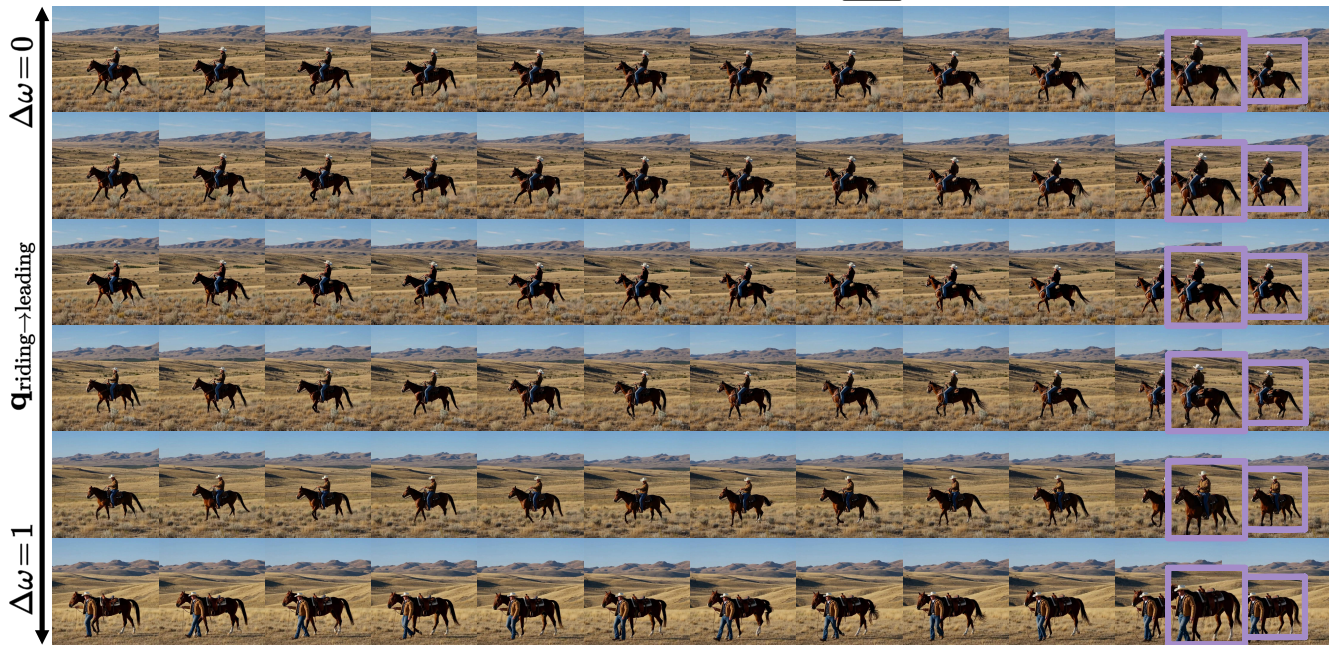

(f) Gemma 3 modulations between `riding` and `leading`.

Figure 12. **Examples of action modulations.** Frame quality is compressed due to filesize (best viewed digitally).

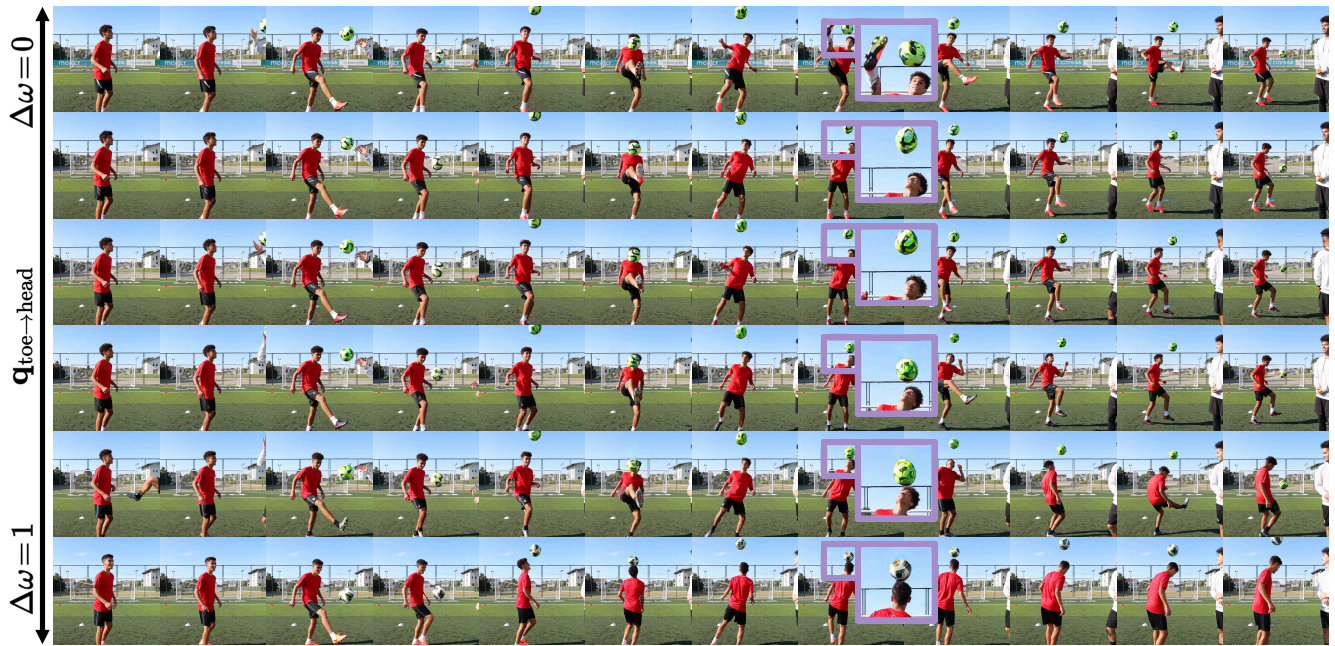

(g) Phi 4 MM modulations between `toe bouncing` and `head bouncing`.

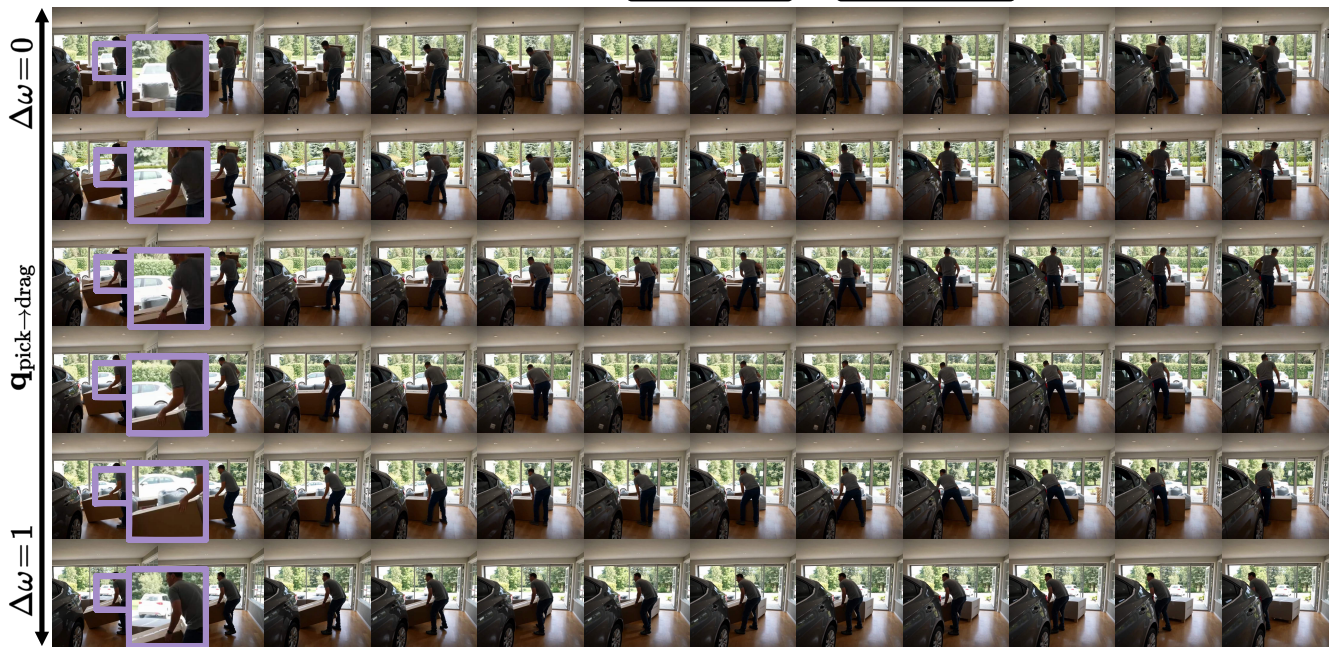

(h) Phi 4 MM modulations between `picks up` and `drags`.

Figure 12. **Examples of action modulations.** Frame quality is compressed due to filesize (best viewed digitally).

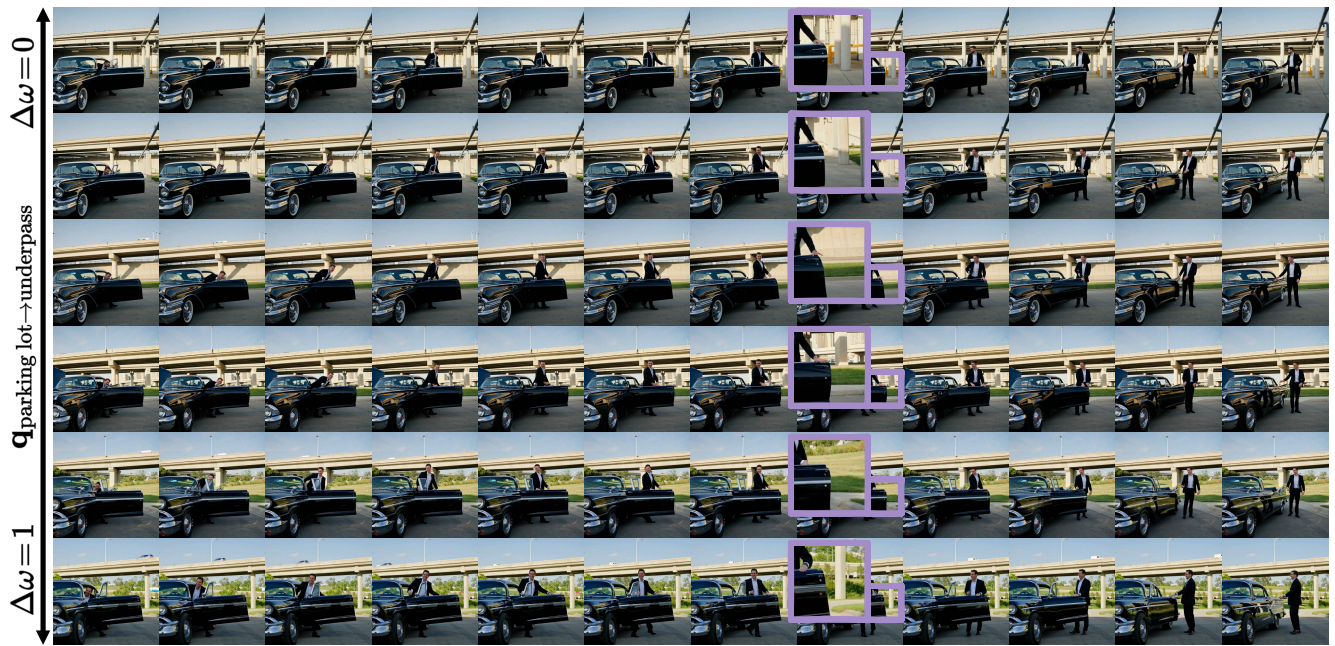

(a) Video LLaMA 3 modulations between `parking lot` and `underpass`.

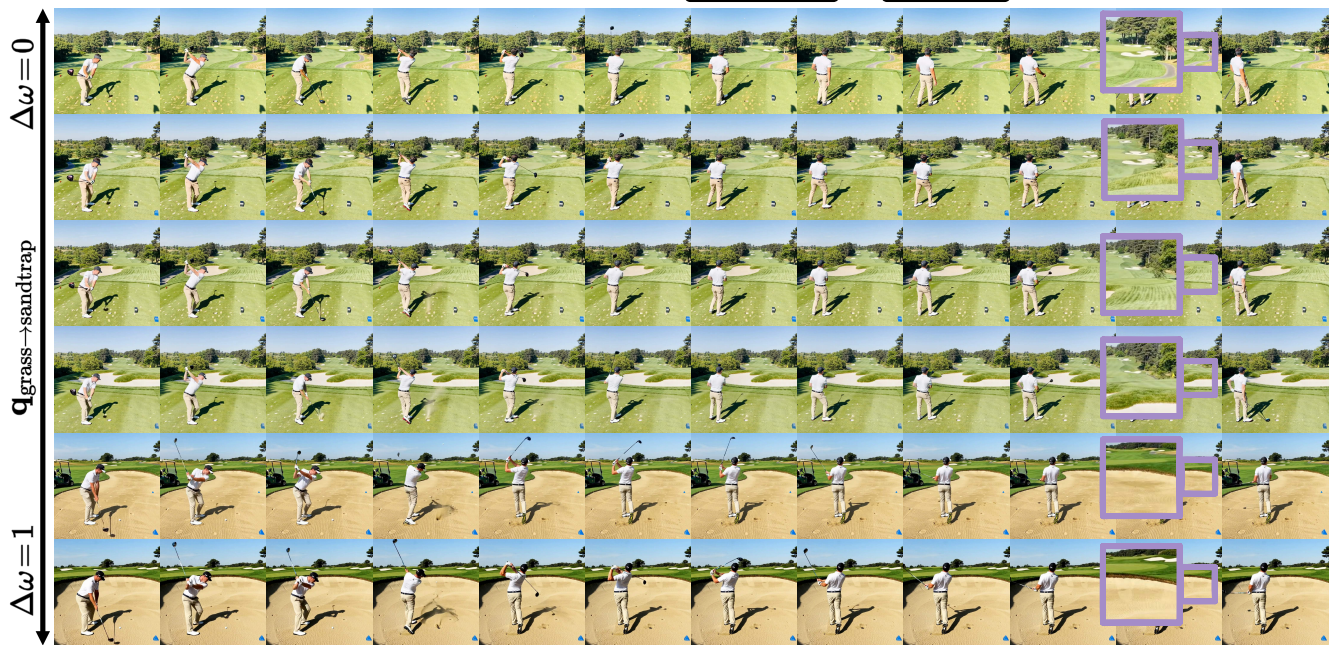

(b) Video LLaMA 3 modulations between `grass` and `sandtrap`.

Figure 13. **Examples of scene modulations.** Frame quality is compressed due to filesize (best viewed digitally).

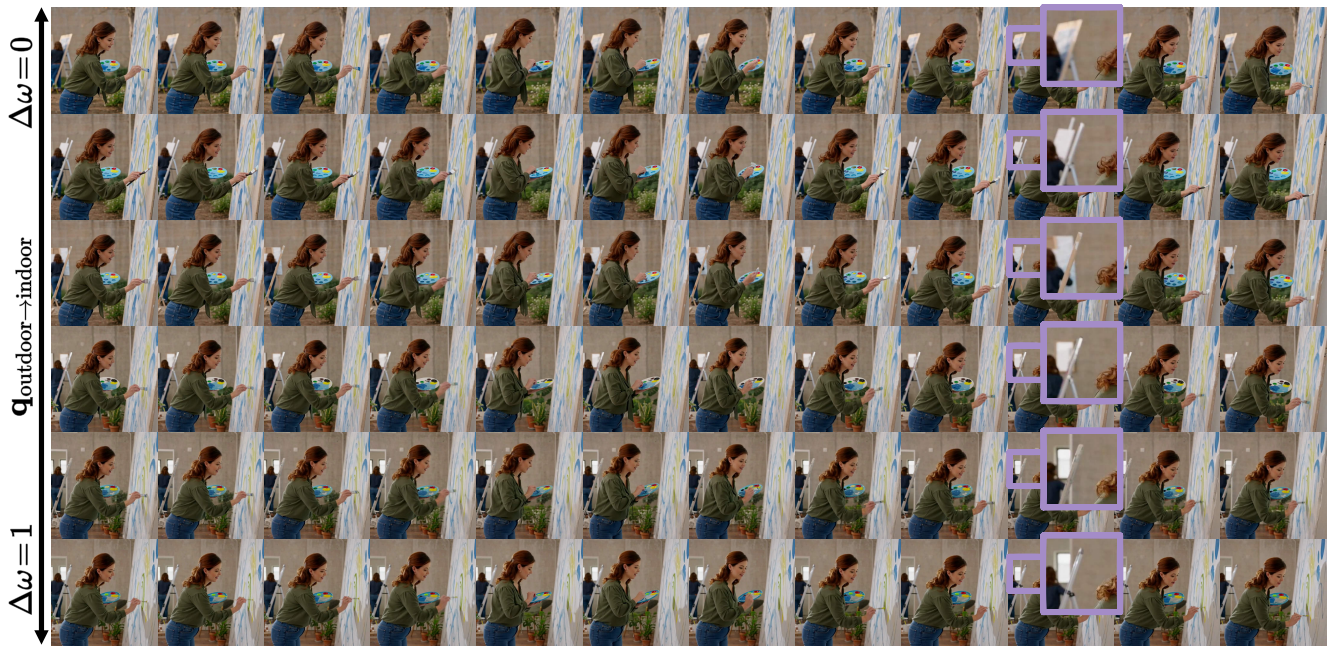

(c) Gemma 3 modulations between `outdoor` and `indoor`.

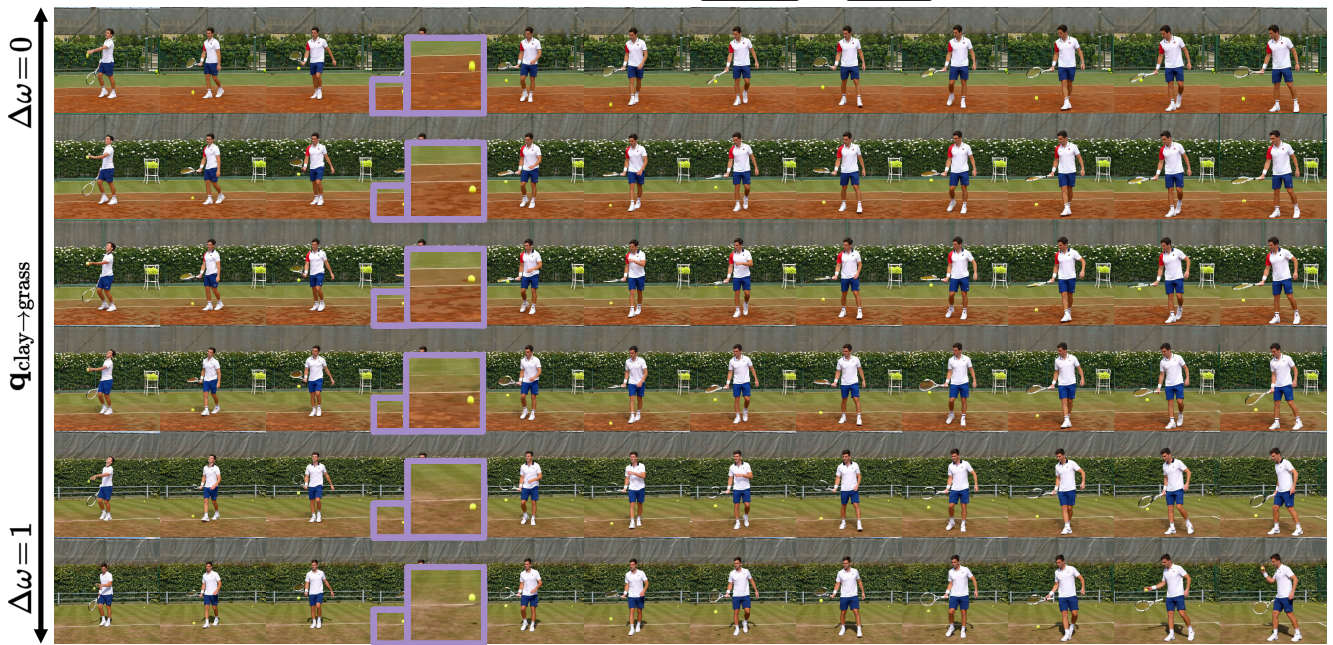

(d) Gemma 3 modulations between `clay` and `grass`.

Figure 13. **Examples of scene modulations.** Frame quality is compressed due to filesize (best viewed digitally).

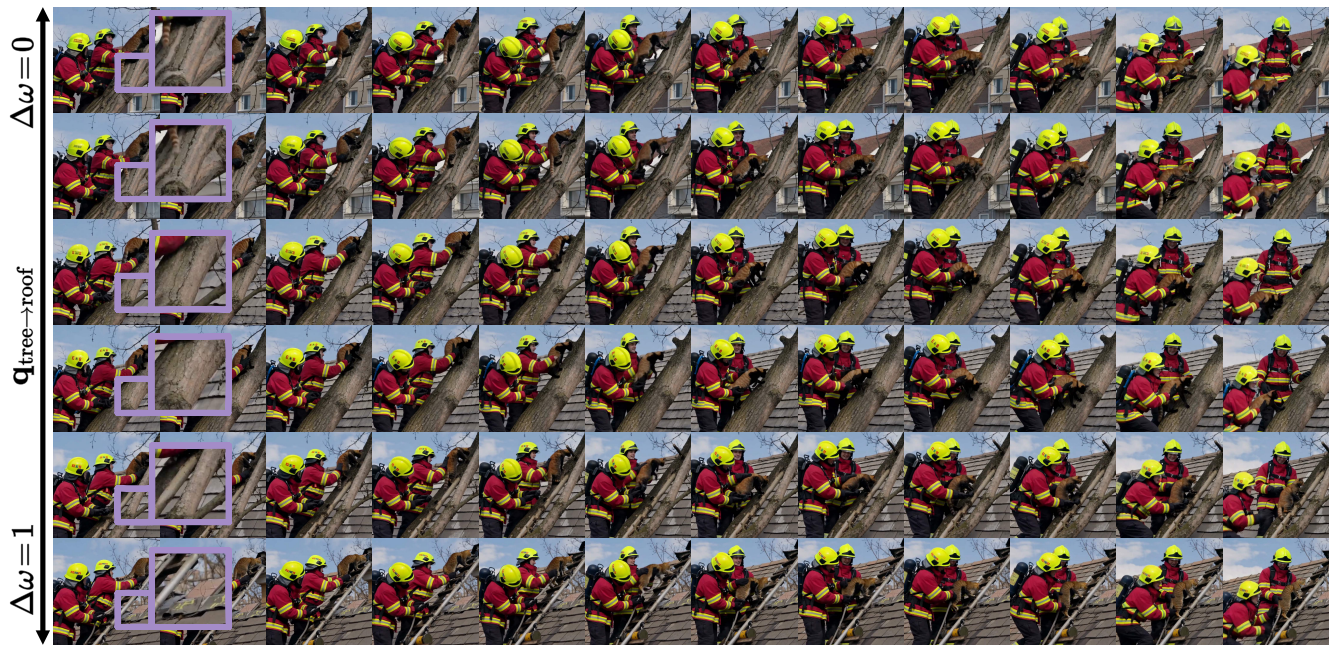

(c) Phi 4 MM modulations between `tree` and `roof`

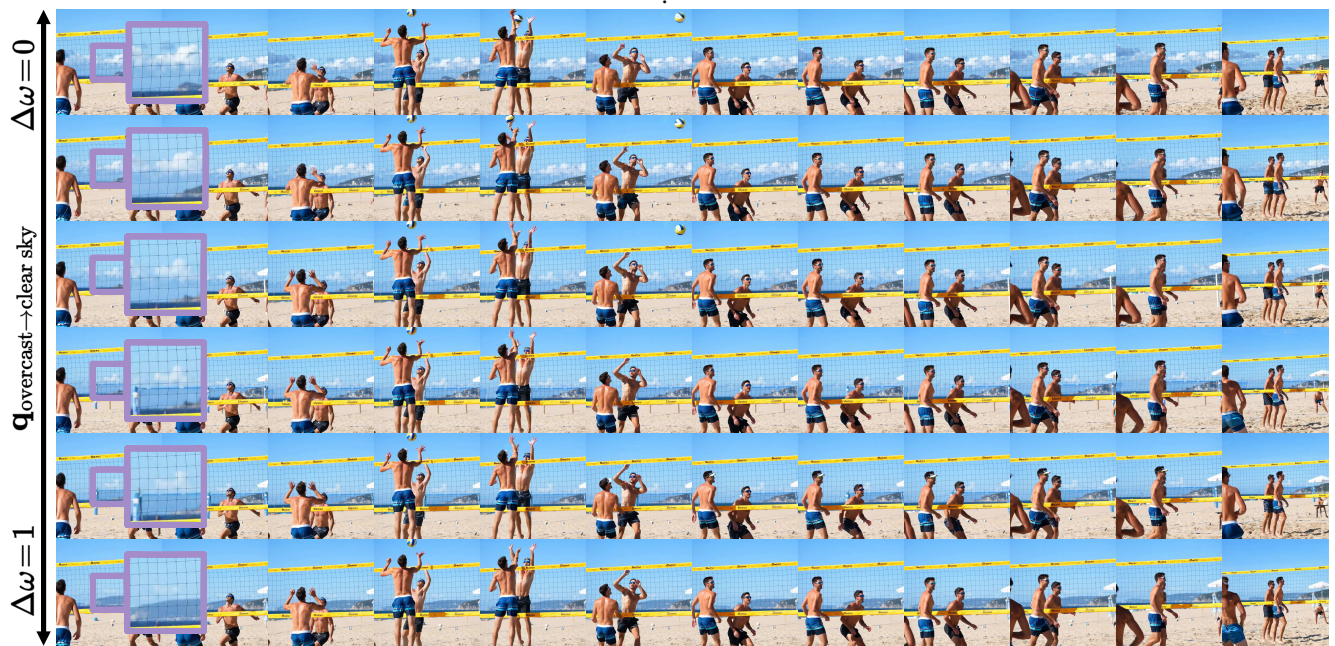

(f) Phi 4 MM modulations between `overcast` and `clear sky`

Figure 13. Examples of scene modulations. Frame quality is compressed due to filesize (best viewed digitally).

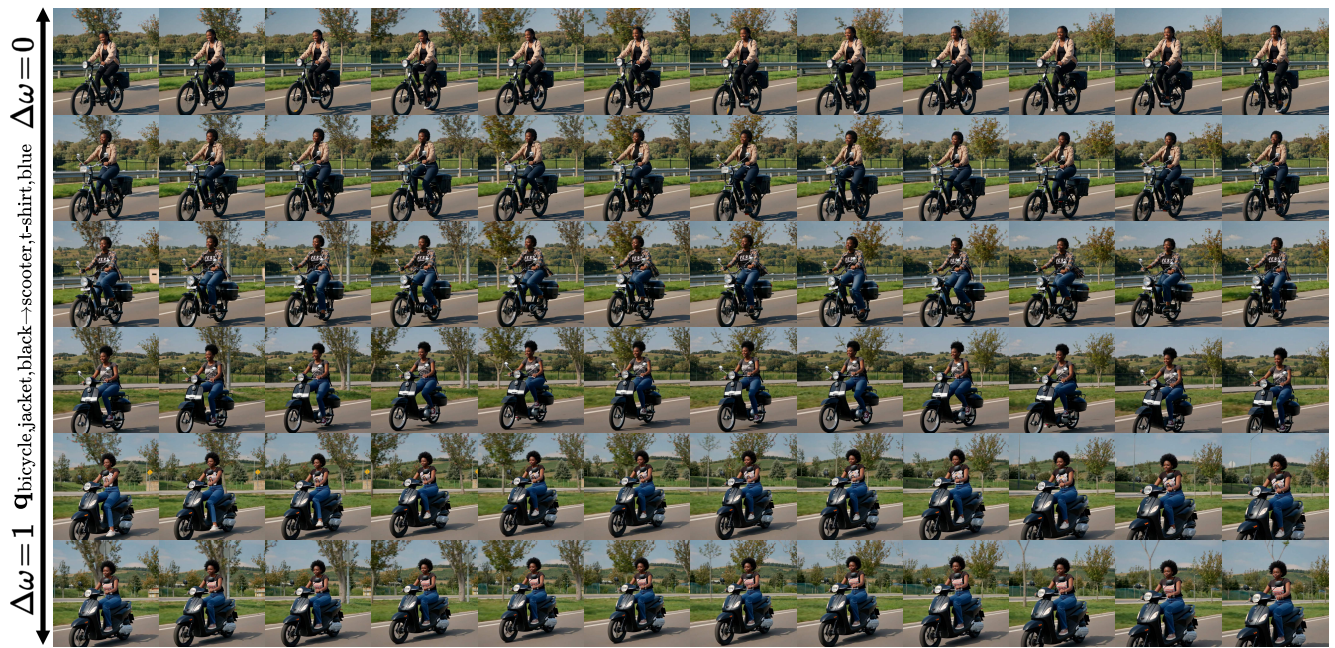

(a) Video LLaMA 3 modulations between `bicycle`, `jacket`, `black` and `scooter`, `t-shirt`, `blue`.

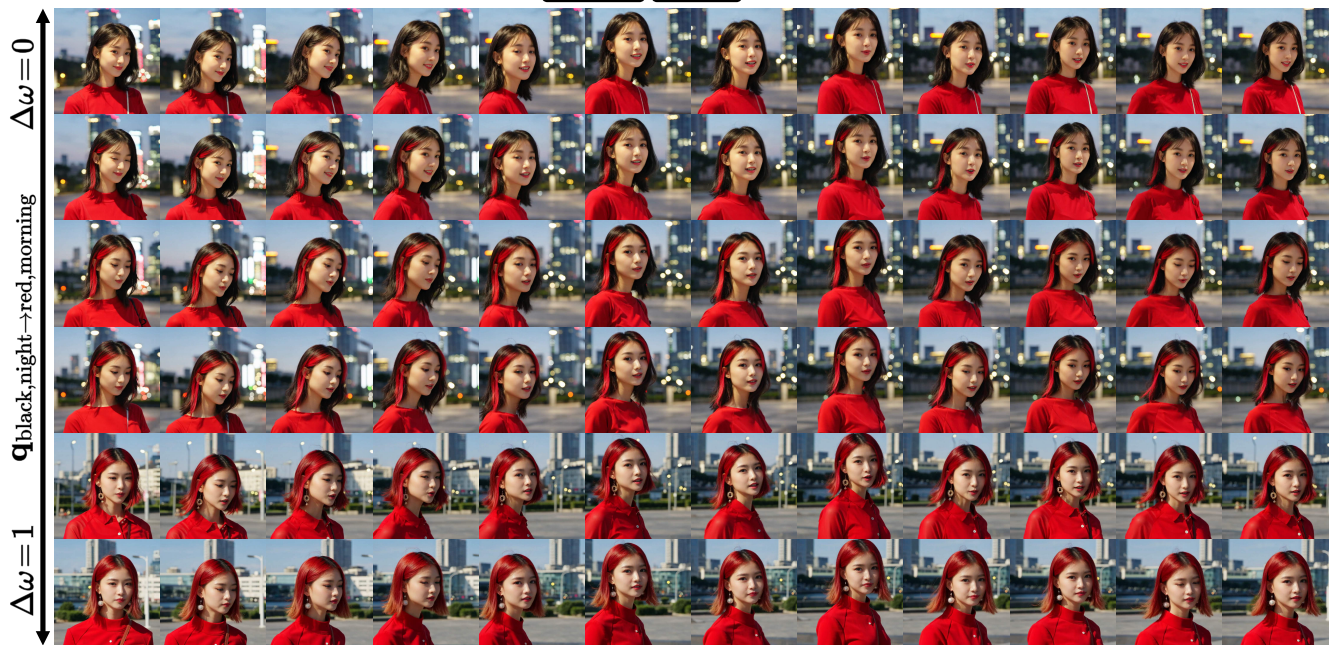

(b) Gemma 3 modulations between `black`, `night` and `red`, `morning`.

Figure 14. Examples of multiple modulations. Frame quality is compressed due to filesize (best viewed digitally).

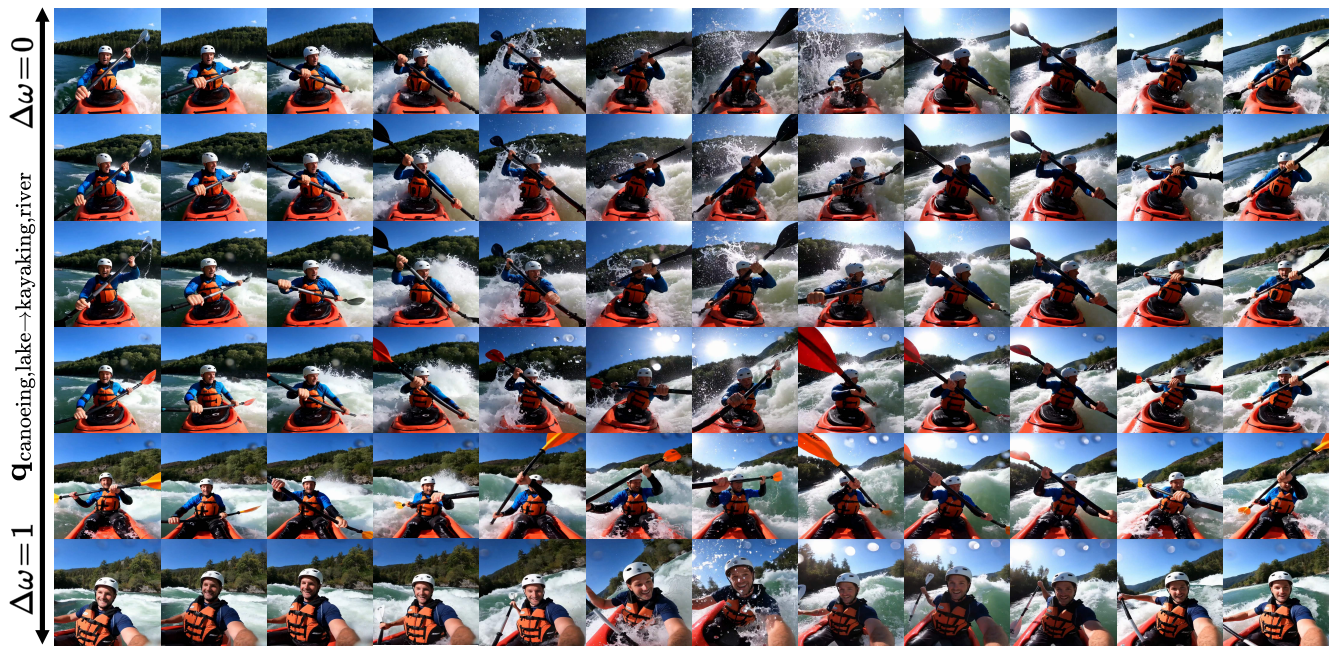

(c) Phi 4 MM modulations between `canoeing`, `lake` and `kayaking`, `river`.

Figure 14. **Examples of multiple modulations.** Frame quality is compressed due to filesize (best viewed digitally).
